# Supplementary material for: How do mutations affect the structural characteristics and substrate binding of CYP21A2? An investigation by molecular dynamics simulations
Source: Royal Society of Chemistry journal article supplement (doi:10.1039/d0cp00763c), 2020-01-01
Supplement: d0cp00763c1.pdf [file d0cp00763c1.pdf]

Supplementary Information for  
**How Mutations Affect Structural Characteristics and  
Substrate Binding of CYP21A2? An Investigation by  
Molecular Dynamics Simulations**

Baihui Lin<sup>a</sup>, Hongxing Zhang<sup>a</sup> and Qingchuan Zheng<sup>a,b\*</sup>

a. Laboratory of Theoretical and Computational Chemistry, Institute of Theoretical Chemistry, International Joint Research Laboratory of Nano-Micro Architecture Chemistry, Jilin University, Changchun 130023, People's Republic of China

b. Key Laboratory for Molecular Enzymology and Engineering of the Ministry of Education, Jilin University, Changchun 130023, People's Republic of China

\*Corresponding author. Tel: +86 431 88498966; Fax: +86 431 88498966.

E-mail address: zhengqc@jlu.edu.cn (Q.-C. Zheng)

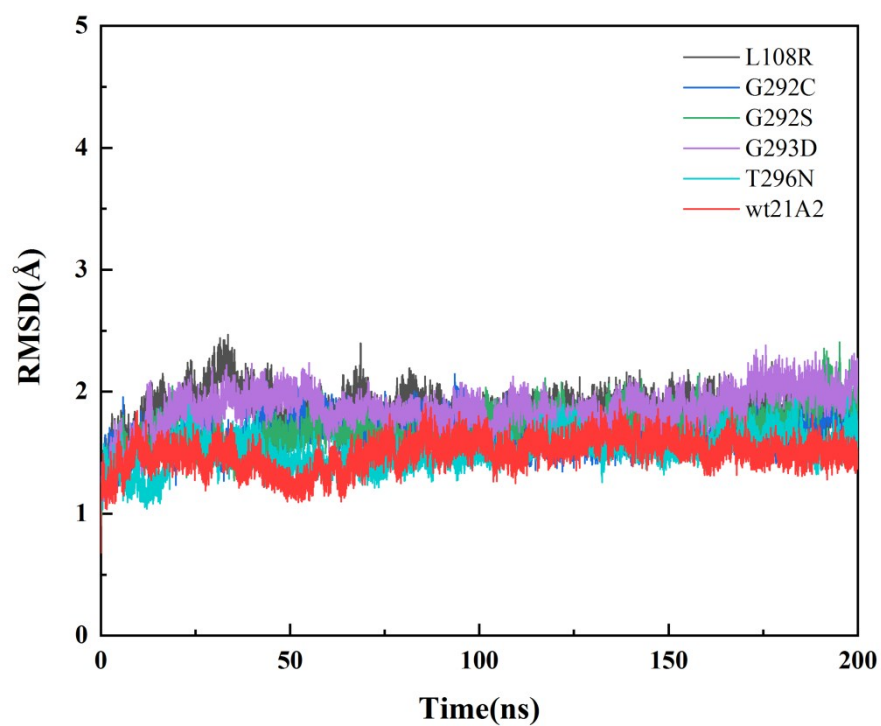

Figure S1. RMSD variations from the starting structures along the simulations for wt21A2, L108R, G292C, G292S, G293D, and T296N.

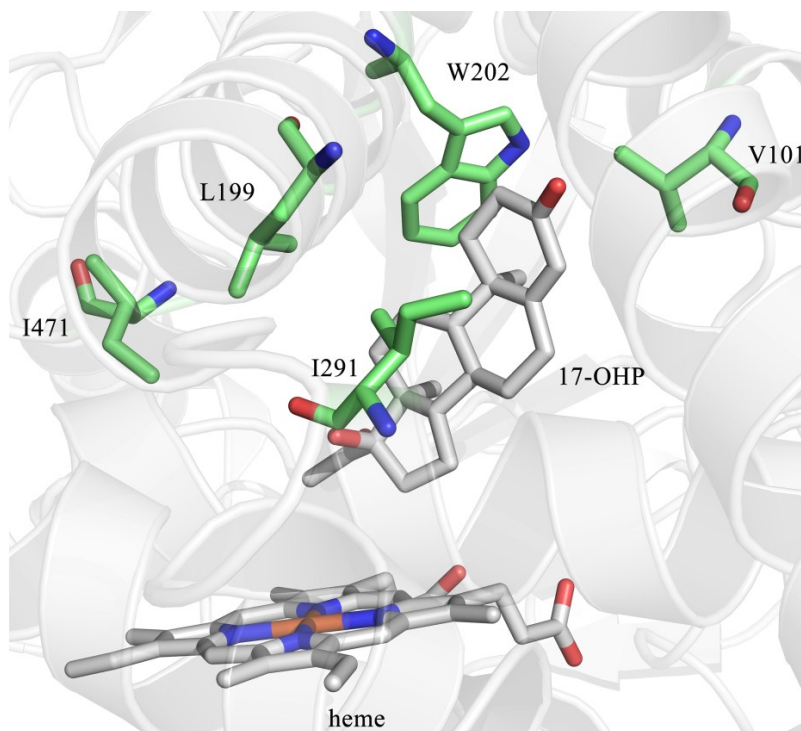

Figure S2. Structural of the substrate binding site in CYP21A2. Hydrophobic residues provide a hydrophobic environment for the substrate binding region. Hydrophobic residues are colored in green.

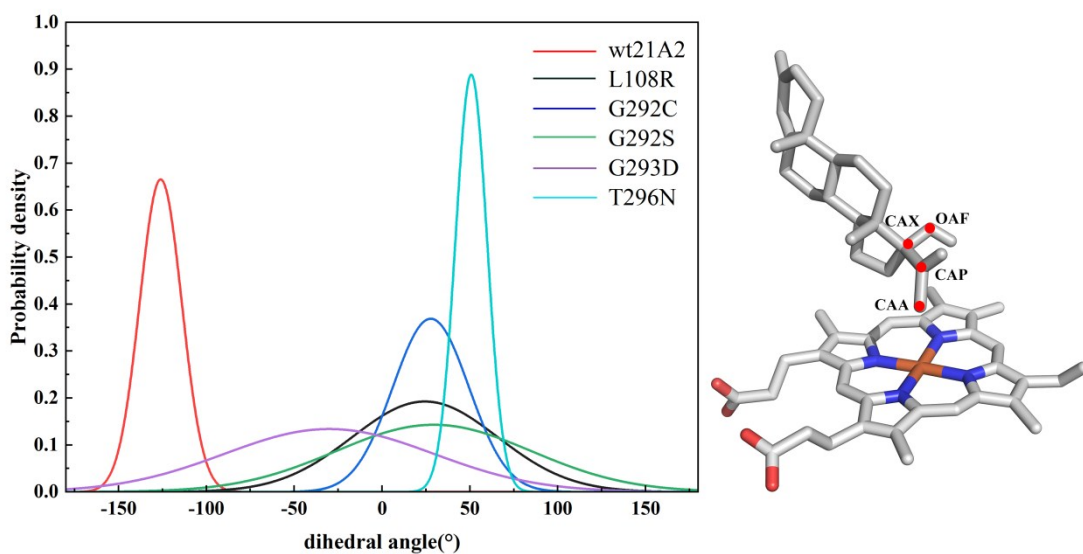

Figure S3. Probability distribution of the substrate dihedral angle for wt21A2, L108R, G292C, G292S, G293D, and T296N. The four atoms that determine the substrate orientation are shown in red dots on the right side.

Table S1. Energy contributions (kcal/mol) of key residues to the binding energy

| Residue | wt21A2 | L108R | G292C | G292S | G293D | T296N |
|---------|--------|-------|-------|-------|-------|-------|
| Val101  | -1.34  | -0.78 | -1.32 | -1.12 | -1.04 | -1.42 |
| Ser109  | -1.07  | -1.03 | -0.96 | -1.15 | -1.00 | -1.21 |
| Leu199  | -1.22  | -1.37 | -1.03 | -1.13 | -1.37 | -1.12 |
| Trp202  | -2.81  | -3.11 | -3.10 | -3.59 | -3.17 | -3.3  |
| Arg234  | -0.92  | -0.15 | -0.78 | -0.22 | 0.18  | -0.30 |
| Ile291  | -2.00  | -1.83 | -2.04 | -1.87 | -0.87 | -2.24 |
| Thr296  | -4.16  | -0.82 | -1.88 | -0.54 | -0.61 | -3.43 |
| Ile471  | -1.02  | -0.46 | -1.06 | -0.79 | -0.52 | -0.76 |
| HEM     | -6.35  | -3.85 | -1.40 | -2.69 | -4.11 | -3.30 |

Table S2. (A) Decomposition of binding energy (kcal/mol) of key residue for wt21A2

| Residue | Van der Waal | Electrostatic | Polar solvation | Non-polar solvation | Total |
|---------|--------------|---------------|-----------------|---------------------|-------|
| Val101  | -1.12        | 0.12          | -0.26           | -0.08               | -1.34 |
| Ser109  | -0.91        | 0.17          | -0.24           | -0.09               | -1.07 |
| Leu199  | -1.27        | -0.06         | 0.22            | -0.11               | -1.22 |
| Trp202  | -2.48        | -0.48         | 0.31            | -0.16               | -2.81 |
| Arg234  | -0.41        | -6.84         | 6.38            | -0.05               | -0.92 |
| Ile291  | -2.42        | 0.22          | 0.41            | -0.21               | -2.00 |
| Thr296  | -0.48        | -2.85         | -0.71           | -0.12               | -4.16 |
| Ile471  | -0.77        | -0.29         | 0.18            | -0.13               | -1.02 |
| HEM     | -4.31        | -4.94         | 3.08            | -0.18               | -6.35 |

Table S2. (B) Decomposition of binding energy (kcal/mol) of key residue for L108R

| Residue | Van der Waal | Electrostatic | Polar solvation | Non-polar solvation | Total |
|---------|--------------|---------------|-----------------|---------------------|-------|
| Val101  | -0.87        | 0.29          | -0.10           | -0.10               | -0.78 |
| Ser109  | -0.92        | 0.16          | -0.17           | -0.11               | -1.03 |
| Leu199  | -1.49        | -0.09         | 0.34            | -0.14               | -1.37 |
| Trp202  | -2.85        | -0.30         | 0.27            | -0.23               | -3.11 |
| Arg234  | -0.22        | -6.65         | 6.79            | -0.08               | -0.15 |
| Ile291  | -2.51        | -2.12         | 3.06            | -0.26               | -1.83 |
| Thr296  | -0.70        | -0.16         | 0.13            | -0.09               | -0.82 |
| Ile471  | -0.50        | -0.04         | 0.13            | -0.05               | -0.46 |
| HEM     | -3.40        | -0.61         | 0.32            | -0.15               | -3.85 |

Table S2. (C) Decomposition of binding energy (kcal/mol) of key residue for G292C

| Residue | Van der Waal | Electrostatic | Polar solvation | Non-polar solvation | Total |
|---------|--------------|---------------|-----------------|---------------------|-------|
| Val101  | -1.14        | 0.15          | -0.24           | -0.09               | -1.32 |
| Ser109  | -0.72        | 0.02          | -0.18           | -0.08               | -0.96 |
| Leu199  | -1.23        | -0.06         | 0.34            | -0.09               | -1.03 |
| Trp202  | -2.73        | -0.45         | 0.27            | -0.20               | -3.10 |
| Arg234  | -0.22        | -6.30         | 5.78            | -0.05               | -0.78 |
| Ile291  | -2.22        | 0.24          | 0.18            | -0.24               | -2.04 |
| Thr296  | -0.63        | -0.98         | -0.20           | -0.08               | -1.88 |
| Ile471  | -1.11        | 0.02          | 0.17            | -0.14               | -1.06 |
| HEM     | -1.76        | -1.02         | 1.45            | -0.07               | -1.40 |

Table S2. (D) Decomposition of binding energy (kcal/mol) of key residue for G292S

| Residue | Van der Waal | Electrostatic | Polar solvation | Non-polar solvation | Total |
|---------|--------------|---------------|-----------------|---------------------|-------|
| Val101  | -1.15        | 0.23          | -0.06           | -0.13               | -1.12 |
| Ser109  | -1.00        | 0.07          | -0.13           | -0.09               | -1.15 |
| Leu199  | -1.32        | -0.09         | 0.37            | -0.09               | -1.13 |
| Trp202  | -3.03        | -0.40         | 0.06            | -0.21               | -3.59 |
| Arg234  | -0.47        | -6.40         | 6.70            | -0.04               | -0.22 |
| Ile291  | -2.16        | 0.09          | 0.40            | -0.19               | -1.87 |
| Thr296  | -0.47        | 0.15          | -0.18           | -0.05               | -0.54 |
| Ile471  | -0.79        | 0.05          | 0.06            | -0.11               | -0.79 |
| HEM     | -2.53        | -0.32         | 0.23            | -0.07               | -2.69 |

Table S2. (E) Decomposition of binding energy (kcal/mol) of key residue for G293D

| Residue | Van der Waal | Electrostatic | Polar solvation | Non-polar solvation | Total |
|---------|--------------|---------------|-----------------|---------------------|-------|
| Val101  | -1.04        | 0.21          | -0.09           | -0.12               | -1.04 |
| Ser109  | -0.97        | 0.22          | -0.16           | -0.09               | -1.00 |
| Leu199  | -1.53        | -0.01         | 0.28            | -0.11               | -1.37 |

|        |       |       |       |       |       |
|--------|-------|-------|-------|-------|-------|
| Trp202 | -2.97 | -0.37 | 0.39  | -0.23 | -3.17 |
| Arg234 | -0.50 | -6.50 | 7.24  | -0.05 | 0.18  |
| Ile291 | -2.64 | -0.66 | 2.63  | -0.20 | -0.87 |
| Thr296 | -0.57 | 0.19  | -0.16 | -0.08 | -0.61 |
| Ile471 | -0.46 | 0.00  | 0.03  | -0.10 | -0.52 |
| HEM    | -3.40 | -2.22 | 1.68  | -0.16 | -4.11 |

Table S2. (F) Decomposition of binding energy (kcal/mol) of key residue for T296N

| Residue | Van der Waal | Electrostatic | Polar solvation | Non-polar solvation | Total |
|---------|--------------|---------------|-----------------|---------------------|-------|
| Val101  | -1.26        | 0.17          | -0.21           | -0.12               | -1.42 |
| Ser109  | -1.00        | 0.07          | -0.18           | -0.09               | -1.21 |
| Leu199  | -1.23        | -0.11         | 0.30            | -0.08               | -1.12 |
| Trp202  | -2.95        | -0.41         | 0.26            | -0.20               | -3.30 |
| Arg234  | -0.41        | -6.91         | 7.05            | -0.03               | -0.30 |
| Ile291  | -2.59        | -0.08         | 0.64            | -0.22               | -2.24 |
| Thr296  | -0.52        | -6.36         | 3.58            | -0.13               | -3.43 |
| Ile471  | -0.85        | 0.04          | -0.02           | -0.08               | -0.30 |
| HEM     | -2.66        | 0.27          | -0.81           | -0.10               | -3.30 |

Table S3. Hydrogen Bonds Occupancies of Crucial Residues for wt21A2, L108R, G292C, G292S, G293D, and T296N

| H-bond              | Occupied (%) |       |       |       |       |       |
|---------------------|--------------|-------|-------|-------|-------|-------|
|                     | Wt21A2       | L108R | G292C | G292S | G293D | T296N |
| D288@O-L/R108@H     | NA           | 75.10 | NA    | NA    | NA    | NA    |
| D288@O-G/C/S292@H   | 77.95        | NA    | 91.65 | 86.4  | NA    | 77.35 |
| L289@O-G/D293@H     | 99.15        | NA    | 99.25 | 98.40 | 98.40 | 98.15 |
| G/C/S292@O-T/N296@H | 98.80        | 41.33 | 89.20 | 88.65 | 41.55 | 97.40 |
| G/D293@O-A298@H     | NA           | 73.37 | NA    | NA    | 98.75 | NA    |
| G/D293@O-A297@H     | NA           | 31.19 | NA    | 15.00 | NA    | NA    |
| G/D293@O-T/N296@H   | NA           | 8.64  | NA    | NA    | 46.30 | NA    |
| T/N296@O-T297@H     | NA           | 20.10 | 21.15 | 15.15 | 77.20 | NA    |
| T/N296@O-17-OHP@H   | 98.70        | NA    | 18.30 | NA    | NA    | 99.40 |
| 17-OHP@O-R234@H     | 97.15        | 99.52 | 86.75 | 97.50 | 99.50 | 99.40 |
